# Supplementary material for: Aquaporin Expression and Water Transport Pathways inside Leaves Are Affected by Nitrogen Supply through Transpiration in Rice Plants
Source: MDPI journal article supplement (doi:10.3390/ijms19010256), 2018-01-16
Supplement: s1 [file s1]

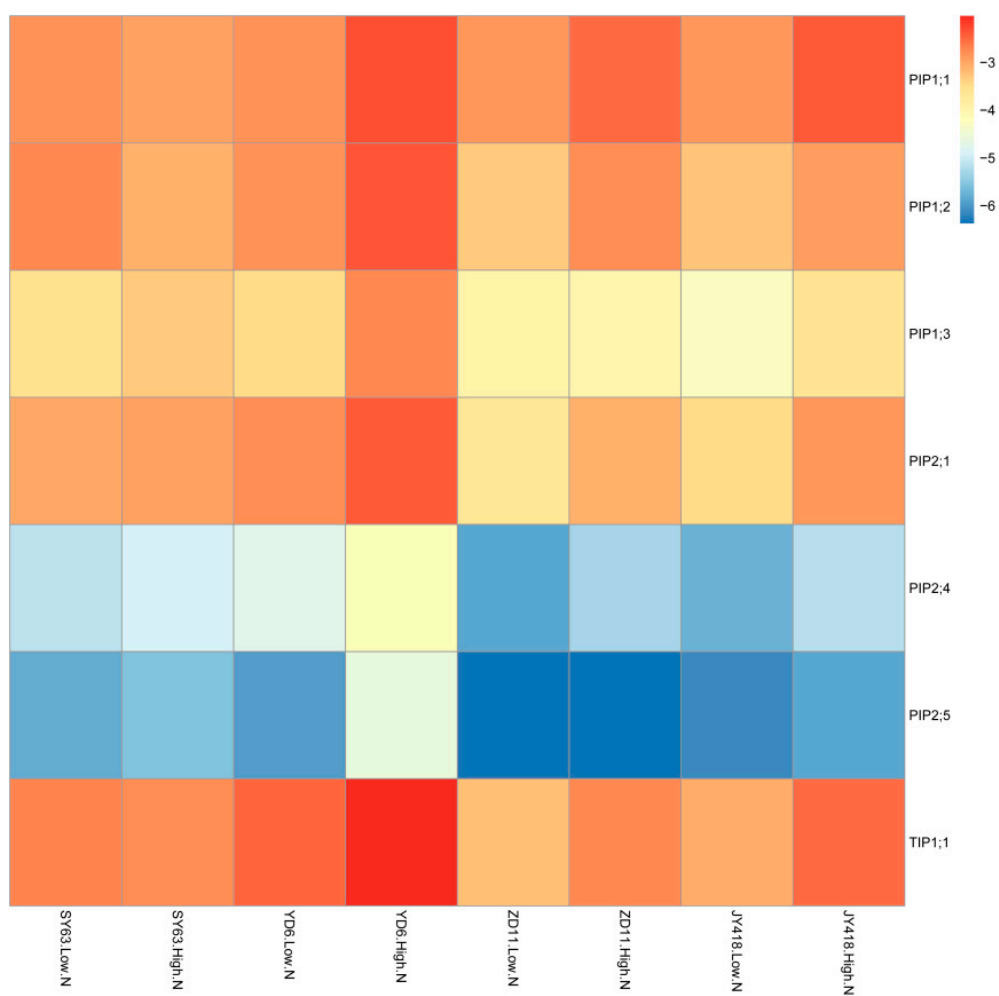

**Figure S1.** The expressions of six PIPs and one TIP in leaves supply with Low-N and High-N in four rice cultivars.

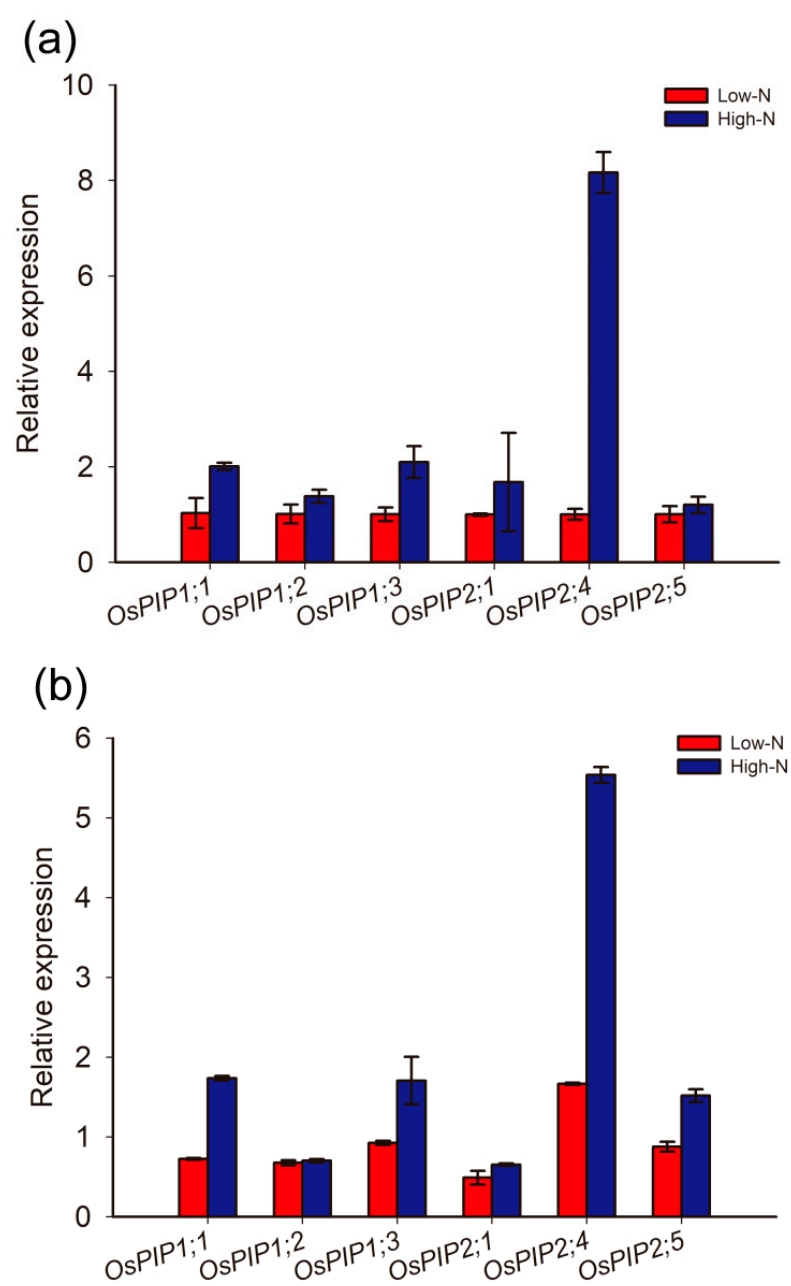

**Figure S2.** The expression of PIPs in roots supply with Low-N and High-N in SY63 and YD6.

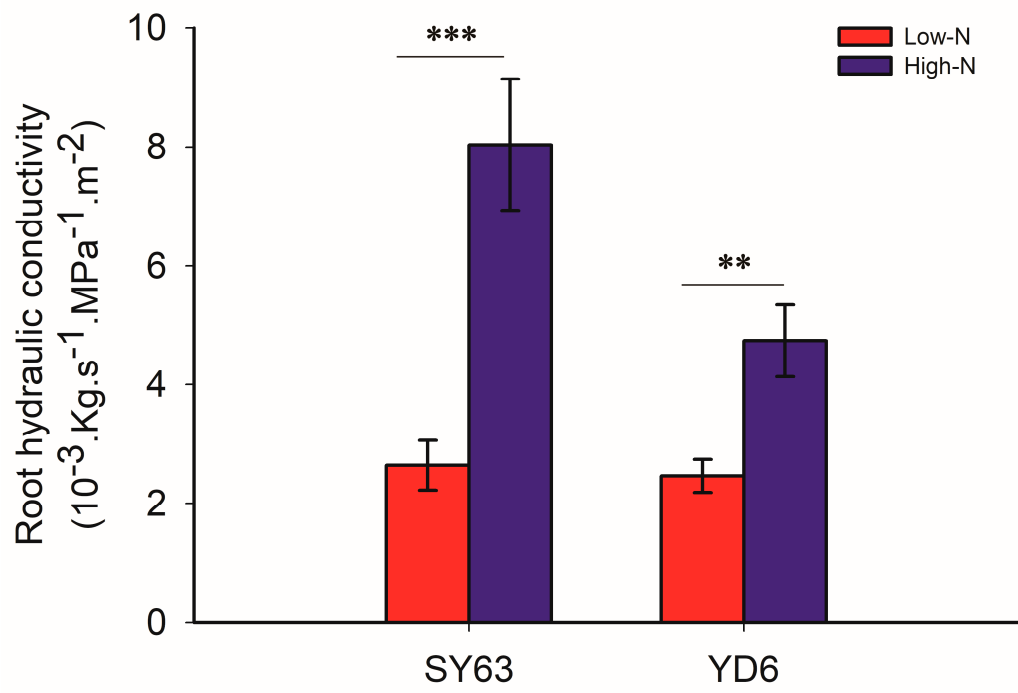

**Figure S3.** The effect of different nitrogen supply on root hydraulic conductivity (Lpr) in SY63 and YD6.
